# Supplementary material
Source: Springer Nature journal article supplement (https://www.springermedizin.de/resource/supplementary/12879_2007_662_MOESM2_ESM.pdf/9449452)

**DDD/1000 Bed days**

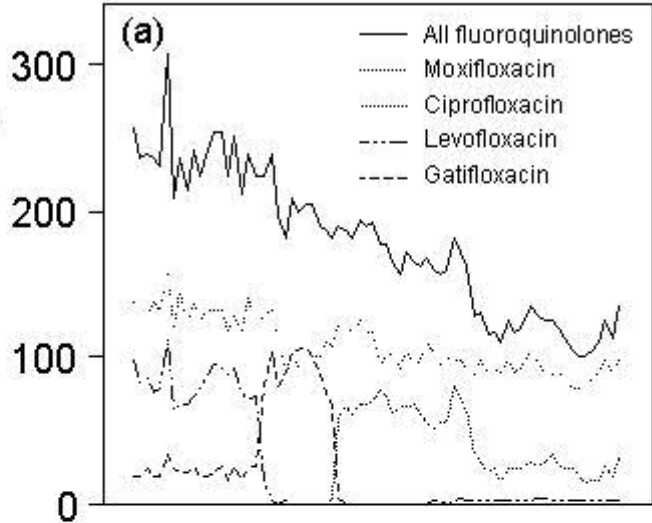

**Percent of total (%)**

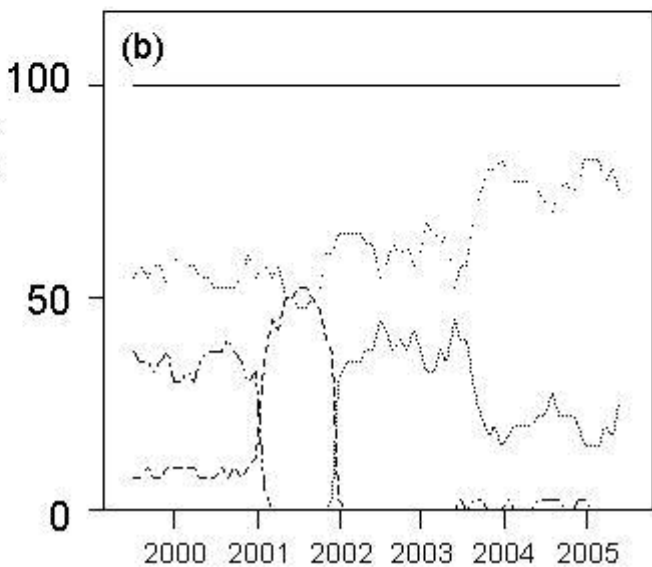

Supplement: MOESM2 [file 9449452]
